# Supplementary material for: SIRT6 exhibits nucleosome-dependent deacetylase activity
Source: PubMed Central journal article supplement — Nucleic Acids Res. 2013 Jul 26;41(18):8537–45. doi: 10.1093/nar/gkt642 (PMC3794599; doi:10.1093/nar/gkt642), 2013-07-26
Supplement: supp_gkt642_nar-00346-m-2013-File003.pdf [file supp_gkt642_nar-00346-m-2013-File003.pdf]

# Supplemental figures

1

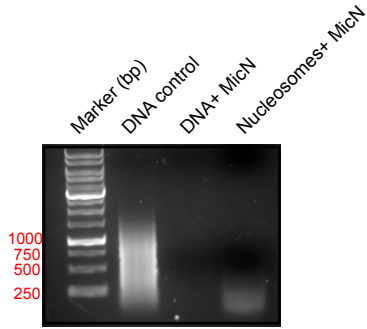

2

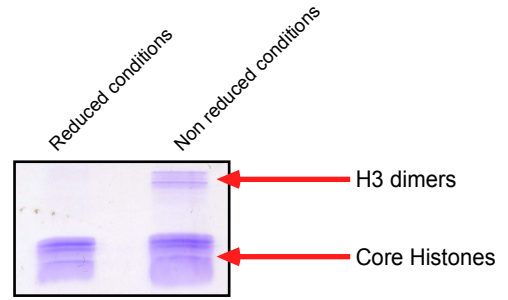

3

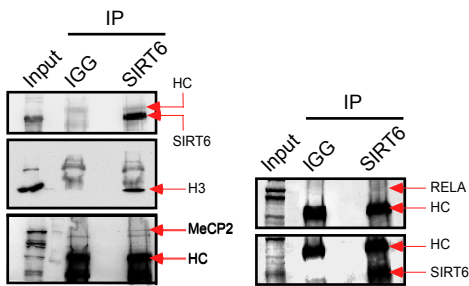

4

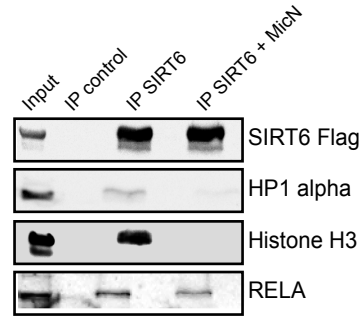

5

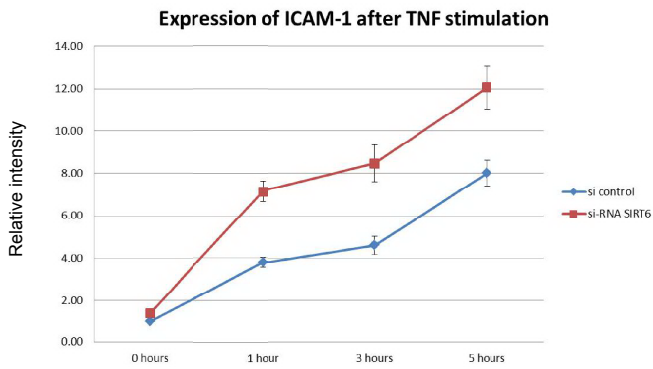

S- At start of the experiment  
E- At end of the experiment

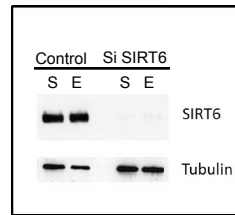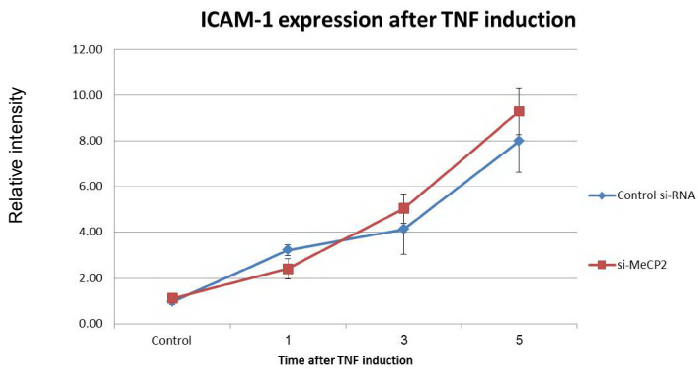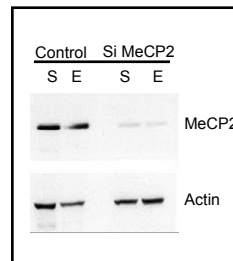

6

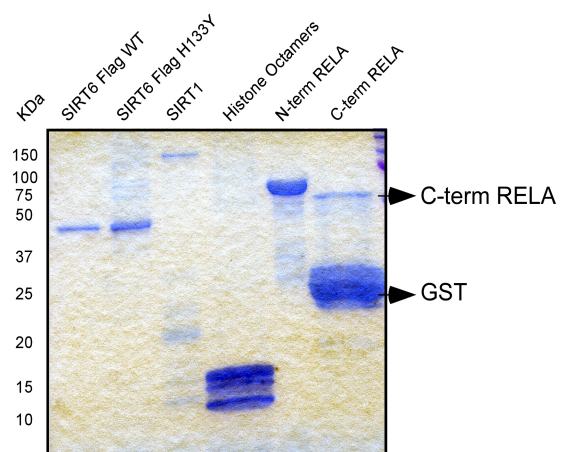

7

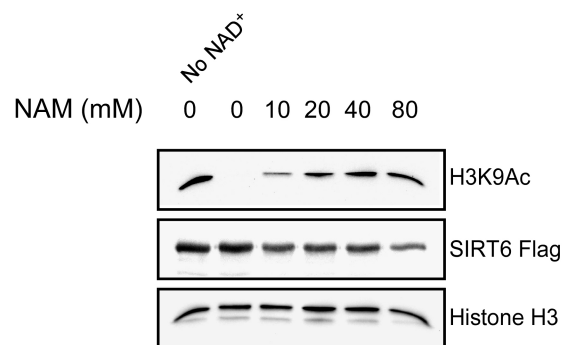

## Supplementary information

**Figure S1. Integrity analysis of the reconstituted nucleosomes.** 1µg of free DNA and 0.5µg of nucleosomal DNA were treated with MicN (0.1 kunitz units) for 30 minutes.

**Figure S2. Integrity analysis of histone octamers.** Histone octamers treated with Laemmli buffer with (right lane) or without (left lane) DTT. Samples were loaded on a 15% SDS PAGE and coomassie stained.

**Figure S3. Endogenous SIRT6 binds Histone H3, RELA and MeCP2.**

**Figure S4. SIRT6 interacts with chromatin-related proteins in a DNA dependent manner.** Disruption of DNA dependent interactions by MicN shows that *in vivo* SIRT6 associations with Hp1α and Histone H3 are DNA dependent. RELA was used as a positive control.

**Figure S5. Knockdown of MeCP2 has no effect on RELA regulated genes.** si-RNA against SIRT6 but not against MeCP2 enhanced ICAM-1 expression upon TNFα stimulation, as measured by quantitative real time PCR. The knockdown efficiencies are shown on the right.

**Figure S6.** Coomassie staining of recombinant SIRT6-Flag, SIRT6-Flag H133Y, SIRT1, histone octamers, and truncated amino terminus (N-term a.a 1-313) or carboxyl terminus (C-term a.a. 334-551) of RELA.

**Figure S7. Nicotinamide (NAM) blocks SIRT6 deacetylase activity.** SIRT6-Flag deacetylation of H3K9Ac, bound in a nucleosome, under increasing concentrations of NAM.
